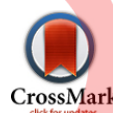

# TNF- $\alpha$ Induces Cytosolic Phospholipase A<sub>2</sub> Expression in Human Lung Epithelial Cells via JNK1/2- and p38 MAPK-Dependent AP-1 Activation

I-Ta Lee<sup>1,2\*</sup>, Chih-Chung Lin<sup>1\*</sup>, Shin-Ei Cheng<sup>2</sup>, Li-Der Hsiao<sup>2</sup>, Yu-Chun Hsiao<sup>2</sup>, Chuen-Mao Yang<sup>2\*</sup>

**1** Department of Anesthetics, Chang Gung Memorial Hospital at Lin-Kou and College of Medicine, Chang Gung University, Kwei-San, Tao-Yuan, Taiwan, **2** Department of Physiology and Pharmacology and Health Aging Research Center, College of Medicine, Chang Gung University, Kwei-San, Tao-Yuan, Taiwan

## Abstract

**Background:** Cytosolic phospholipase A<sub>2</sub> (cPLA<sub>2</sub>) plays a pivotal role in mediating agonist-induced arachidonic acid (AA) release for prostaglandin (PG) synthesis during inflammation triggered by tumor necrosis factor- $\alpha$  (TNF- $\alpha$ ). However, the mechanisms underlying TNF- $\alpha$ -induced cPLA<sub>2</sub> expression in human lung epithelial cells (HPAECs) were not completely understood.

**Principal Findings:** We demonstrated that TNF- $\alpha$  induced cPLA<sub>2</sub> mRNA and protein expression, promoter activity, and PGE<sub>2</sub> secretion in HPAECs. These responses induced by TNF- $\alpha$  were inhibited by pretreatment with the inhibitor of MEK1/2 (PD98059), p38 MAPK (SB202190), JNK1/2 (SP600125), or AP-1 (Tanshinone IIA) and transfection with siRNA of TNFR1, p42, p38, JNK2, c-Jun, c-Fos, or ATF2. We showed that TNF- $\alpha$  markedly stimulated p42/p44 MAPK, p38 MAPK, and JNK1/2 phosphorylation which were attenuated by their respective inhibitors. In addition, TNF- $\alpha$  also stimulated c-Jun and ATF2 phosphorylation which were inhibited by pretreatment with SP600125 and SB202190, respectively, but not PD98059. Furthermore, TNF- $\alpha$ -induced cPLA<sub>2</sub> promoter activity was abrogated by transfection with the point-mutated AP-1 cPLA<sub>2</sub> construct. Finally, we showed that TNF- $\alpha$  time-dependently induced p300/c-Fos/c-Jun/ATF2 complex formation in HPAECs. On the other hand, TNF- $\alpha$  induced *in vivo* binding of c-Jun, c-Fos, ATF2, and p300 to the cPLA<sub>2</sub> promoter in these cells. In an *in vivo* study, we found that TNF- $\alpha$  induced leukocyte count in BAL fluid of mice and cPLA<sub>2</sub> mRNA levels in lung tissues via MAPKs and AP-1.

**Significance:** Taken together, these results demonstrated that TNF- $\alpha$ -induced cPLA<sub>2</sub> expression was mediated through p38 MAPK- and JNK1/2-dependent p300/c-Fos/c-Jun/ATF2 complex formation in HPAECs.

**Citation:** Lee I-T, Lin C-C, Cheng S-E, Hsiao L-D, Hsiao Y-C, et al. (2013) TNF- $\alpha$  Induces Cytosolic Phospholipase A<sub>2</sub> Expression in Human Lung Epithelial Cells via JNK1/2- and p38 MAPK-Dependent AP-1 Activation. PLoS ONE 8(9): e72783. doi:10.1371/journal.pone.0072783

**Editor:** Guangwei Liu, Department of Immunology, China

**Received:** May 1, 2013; **Accepted:** July 11, 2013; **Published:** September 19, 2013

**Copyright:** © 2013 Lee et al. This is an open-access article distributed under the terms of the Creative Commons Attribution License, which permits unrestricted use, distribution, and reproduction in any medium, provided the original author and source are credited.

**Funding:** This work was supported by the Ministry of Education, Taiwan, grant numbers EMRPD1C0261 and EMRPD1C0271; National Science Council, Taiwan, grant numbers NSC101-2321-B-182-013, NSC101-2320-B-182-039-MY3, NSC99-2321-B182-003, and NSC98-2320-B-255-001-MY3; and Chang Gung Medical Research Foundation, grant numbers CMRPD180373, CMRPD180381, CMRPG391033, and CMRPG3B1091. The funders had no role in study design, data collection and analysis, decision to publish, or preparation of the manuscript.

**Competing Interests:** The authors have declared that no competing interests exist.

\* E-mail: chuenmao@mail.cgu.edu.tw

† These authors contributed equally to this work.

## Introduction

Lung inflammation is a pivotal event in the pathogenesis of chronic obstructive pulmonary disease (COPD) and asthma [1]. Several lipid mediators, such as eicosanoids generated from arachidonic acid (AA) have been identified *in situ* in airway secretion of asthmatics [2,3]. The generation of eicosanoids is first initiated through the release of AA from membrane phospholipids hydrolyzed by the action of phospholipase A<sub>2</sub> (PLA<sub>2</sub>) enzymes [4]. AA is further converted to prostaglandins (PGs), such as PGE<sub>2</sub> by the constitutive enzyme cyclooxygenase (COX)-1 or the inducible COX-2 in various cell types [5,6]. The PLA<sub>2</sub> superfamily is composed of three main types of lipolytic enzymes, including secretory PLA<sub>2</sub>, the 85 kDa cytosolic group IV PLA<sub>2</sub> (cPLA<sub>2</sub>), and a calcium-independent group VI PLA<sub>2</sub> in mammalian cells [7]. cPLA<sub>2</sub> is the only one that plays a key role in mediating agonist-

induced AA release for eicosanoid production in various cell types [8]. It has been demonstrated that activation of the MAPKs, including p42/p44 MAPK, p38 MAPK, and JNK1/2, by pro-inflammatory stimuli leads to the phosphorylation of cPLA<sub>2</sub> at Ser<sup>505</sup> and Ser<sup>727</sup> [9] with Ca<sup>2+</sup>/calmodulin kinase II-dependent phosphorylation of Ser<sup>515</sup> associated with increased enzymatic activity [10]. cPLA<sub>2</sub> has been shown to be implicated in acute lung injury induced by sepsis [11] and bronchial reactivity associated with anaphylaxis [12]. Furthermore, increased PGE<sub>2</sub> synthesis is dependent on an increase in cPLA<sub>2</sub> activity in various cell types [13,14]. Elevated levels of pro-inflammatory cytokines, including TNF- $\alpha$  in the bronchoalveolar lavage fluid have been detected in allergic asthmatic patients. TNF- $\alpha$  exerts as a potent stimulus in inflammatory responses through up-regulation of target genes, such as cPLA<sub>2</sub> in various cell types [15,16]. The expression of cPLA<sub>2</sub> induced by TNF- $\alpha$  may be integrated to the signaling

networks that augment lung inflammation by enhancing PGE<sub>2</sub> synthesis. Although cPLA<sub>2</sub> has been shown to mediate inflammatory reactions, the detail mechanisms underlying TNF- $\alpha$ -induced cPLA<sub>2</sub> expression and PGE<sub>2</sub> synthesis in human lung epithelial cells (HPAECs) were not completely understood.

Several extracellular stimuli elicit a broad spectrum of biological responses through activation of MAPK cascades leading to phosphorylation of specific target proteins [17]. Moreover, we have demonstrated that TNF- $\alpha$  causes a rapid phosphorylation of p42/p44 MAPK or p38 MAPK and up-regulation of COX-2 in human airway smooth muscle cells [18]. In addition, JNK1/2, p42/p44 MAPK, and p38 MAPK have also been shown to be involved in lipopolysaccharide (LPS)-induced cPLA<sub>2</sub> induction in canine tracheal smooth muscle cells [19]. On the other hand, we have also indicated that MAPKs and NF- $\kappa$ B were involved in TNF- $\alpha$ -induced PGE<sub>2</sub> release in human airway smooth muscle cells [20]. Therefore, in this study, we investigated the roles of MAPKs in TNF- $\alpha$ -mediated cPLA<sub>2</sub> expression and PGE<sub>2</sub> synthesis in HPAECs.

AP-1 is a heterogeneous collection of dimeric transcription factors comprising Jun, Fos, and ATF subunits. Among AP-1 subunits, c-Jun is the most important transcriptional activator in inflammatory status [21]. AP-1 activity is regulated by multiple mechanisms, including phosphorylation by various MAPKs [22]. Among MAPKs, JNK1/2 predominantly plays an important role in TNF- $\alpha$ -induced AP-1 activity, which contributes to the induction of TNF- $\alpha$ -targeted genes [23]. Histone acetyltransferases (HATs), such as p300 and CREB-binding protein functioning as transcriptional co-activators and signal integrators have been proved to play a vital role in expression of inflammatory genes, such as cPLA<sub>2</sub> or COX-2 [20,24]. By this model, the activities of HATs must be tightly regulated in response to various stimuli, such as TNF- $\alpha$ , IL-1 $\beta$ , and bacterial toxins [25,26]. It has been demonstrated that pulmonary inflammation, exacerbated asthma, and COPD induced by exposure to diesel exhaust particulate matter are related to the p300 activation and recruitment to the promoter region of COX-2 [27]. Thus, the role of p300 in TNF- $\alpha$ -mediated AP-1 activation leading to cPLA<sub>2</sub> expression was also investigated in HPAECs.

In addressing these questions, experiments were performed to investigate the mechanisms underlying TNF- $\alpha$ -induced cPLA<sub>2</sub> expression and PGE<sub>2</sub> synthesis in HPAECs. These findings suggested that in HPAECs, TNF- $\alpha$ -induced cPLA<sub>2</sub> expression associated with PGE<sub>2</sub> release was, at least in part, mediated through JNK1/2- and p38 MAPK-dependent p300-AP-1 signaling pathway. These results demonstrated that MAPKs and AP-1 may be the critical components implicated in cPLA<sub>2</sub> expression and PGE<sub>2</sub> synthesis in TNF- $\alpha$ -challenged HPAECs.

## Methods

### Materials

Recombinant human TNF- $\alpha$  was from R&D System (Minneapolis, MN). Anti-cPLA<sub>2</sub>, anti-GAPDH, anti-TNFR1, anti-p42, anti-p38, anti-JNK2, anti-c-Jun, anti-c-Fos, anti-ATF2, and anti-p300 antibodies were from Santa Cruz (Santa Cruz, CA). Anti-phospho-p42/p44 MAPK, anti-phospho-p38 MAPK, anti-phospho-JNK1/2, anti-phospho-ATF2, and anti-phospho-c-Jun antibodies were from Cell Signaling (Danver, MA). Actinomycin D (Act. D), cycloheximide (CHI), SP600125, PD98059, SB202190, AACOCF<sub>3</sub>, and Tanshinone IIA were from Biomol (Plymouth Meeting, PA). AH 6809, SC-19220, and GW627368X were from Cayman (Ann Arbor, MI). Other chemicals were from Sigma (St. Louis, MO).

### Cell culture

Human pulmonary alveolar epithelial cells (HPAECs, type II alveolar epithelial cells) were purchased from the ScienCell Research Lab. (San Diego, CA) and grown as previously described [28].

### Western blot analysis

Growth-arrested HPAECs were incubated with thrombin at 37°C for the indicated time intervals. The cells were washed, scraped, collected, and centrifuged at 45000 $\times g$  at 4°C for 1 h to yield the whole cell extract, as previously described [28]. Samples were denatured, subjected to SDS-PAGE using a 10% running gel, transferred to nitrocellulose membrane, incubated with an anti-cPLA<sub>2</sub> antibody for 24 h, and then incubated with an anti-mouse horseradish peroxidase antibody for 1 h. The immunoreactive bands were detected by ECL reagents.

### Real-time PCR

Total RNA was extracted using TRIzol reagent. mRNA was reverse-transcribed into cDNA and analyzed by real-time RT-PCR. Real-time PCR was performed using SYBR Green PCR reagents (Applied Biosystems, Branchburg, NJ) and primers specific for cPLA<sub>2</sub> and GAPDH mRNAs. The levels of cPLA<sub>2</sub> expression were determined by normalizing to GAPDH expression.

### Measurement of cPLA<sub>2</sub> luciferase activity

For construction of the cPLA<sub>2</sub>-luc plasmid, human cPLA<sub>2</sub> promoter, a region spanning -2375 to +75 bp, was cloned into pGL3-basic vector (Promega, Madison, WI). cPLA<sub>2</sub>-luc activity was determined as previously described [28] using a luciferase assay system (Promega, Madison, WI). Firefly luciferase activities were standardized for  $\beta$ -gal activity.

### Measurement of PGE<sub>2</sub> generation

Cells were cultured in 6-well culture plates. After reaching confluence, cells were treated with TNF- $\alpha$  for the indicated times. After treatment, the medium were collected and stored at -80°C until being assayed. PGE<sub>2</sub> was assayed using the PGE<sub>2</sub> enzyme immunoassay kit (Cayman) according to the manufacturer's instructions.

### Transient transfection with siRNAs

Human siRNAs of scrambled, TNFR1, p42, p38, JNK2, c-Jun, c-Fos, and ATF2 were from Sigma (St. Louis, MO). Transient transfection of siRNAs (100 nM) was performed using a Lipofectamine<sup>TM</sup> RNAiMAX reagent according to the manufacturer's instructions.

### Chromatin immunoprecipitation assay

To detect the association of nuclear proteins with human cPLA<sub>2</sub> promoter, chromatin immunoprecipitation (ChIP) analysis was conducted as previously described [20]. DNA immunoprecipitated using an anti-p300, anti-ATF2, anti-c-Fos, or anti-c-Jun antibody was purified. The DNA pellet was re-suspended in H<sub>2</sub>O and subjected to PCR amplification with the forward primer 5'-GAATTCAACCTGATTTTCATTTTCTTCC-3' and the reverse primer 5'-CTTCAGGCTCCTCAATGCCTCTAGCTTTTCAG-3', which were specifically designed from the cPLA<sub>2</sub> promoter region. PCR products were analyzed on ethidium bromide-stained agarose gels (1%).

### Co-immunoprecipitation assay

Cell lysates containing 1 mg of protein were incubated with 2  $\mu$ g of an anti-p300 antibody at 4°C for 24 h, and then 10  $\mu$ l of 50% protein A-agarose beads was added and mixed for 24 h at 4°C. The immunoprecipitates were collected and washed three times with a lysis buffer without Triton X-100. 5X Laemmli buffer was added and subjected to electrophoresis on SDS-PAGE, and then blotted using an anti-c-Fos, anti-c-Jun, anti-ATF2, or anti-p300 antibody.

### Animal care, ethics statement, and experimental procedures

Male ICR mice aged 6–8 weeks were purchased from the National Laboratory Animal Centre (Taipei, Taiwan) and handled according to the guidelines of Animal Care Committee of Chang Gung University approved for this study (IACUC approval number: 12-048) and National Institutes of Health Guides for the Care and Use of Laboratory Animals. All treatments were performed under pentobarbital sodium anesthesia, and all efforts were made to minimize suffering. ICR mice were anesthetized with intraperitoneal injection of 200  $\mu$ l of pentobarbital sodium (5 mg/ml) and placed individually on a board in a near vertical position and the tongues were withdrawn with a lined forceps. TNF- $\alpha$  (0.125 mg/kg body weight) was placed posterior in the throat and aspirated into lungs. Control mice were administrated sterile 0.1% BSA. Mice regained consciousness after 15 min. Mice were i.p. given one dose of PD98059, SB202190, SP600125, Tanshinone IIA, AH 6809, SC-19220, GW627368X, or AA-COCF<sub>3</sub> (2 mg/kg) for 1 h prior to TNF- $\alpha$  treatment, and sacrificed after 24 h.

### Isolation of bronchoalveolar lavage (BAL) fluid

Mice were injected with TNF- $\alpha$  at a dose of 0.75 mg/kg and sacrificed 24 h later. BAL fluid was performed through a tracheal cannula using 1 ml aliquots of ice-cold PBS medium. BAL fluid was centrifuged at 500  $\times$  g at 4°C, and cell pellets were washed and re-suspended in PBS. Leukocyte count was determined by a hemocytometer.

### Analysis of data

All data were estimated and made using a GraphPad Prism Program (GraphPad, San Diego, CA, USA). Data were expressed as the mean  $\pm$  S.E.M. and analyzed by one-way ANOVA followed with Tukey's post-hoc test.  $P < 0.05$  was considered significant.

## Results

### TNF- $\alpha$ induces cPLA<sub>2</sub> expression and PGE<sub>2</sub> release in HPAEpiCs

To determine the effect of TNF- $\alpha$  on cPLA<sub>2</sub> expression, cells were incubated with TNF- $\alpha$  for the indicated time intervals. As shown in Fig. 1A, TNF- $\alpha$  induced cPLA<sub>2</sub> protein expression in a time-dependent manner with a maximal response within 16–24 h. Moreover, TNF- $\alpha$  also enhanced cPLA<sub>2</sub> mRNA accumulation in a time-dependent manner with a maximal response within 4–6 h (Fig. 1B). On the other hand, TNF- $\alpha$  markedly induced cPLA<sub>2</sub> promoter activity in these cells (Fig. 1B). cPLA<sub>2</sub> is the major form of PLA<sub>2</sub>, which selectively hydrolyzes membrane phospholipids at the sn-2 position and is the rate-limiting enzyme in the release of AA [20]. AA is further converted to PGs (i.e. PGE<sub>2</sub>) by the constitutive enzyme COX-1 or by the inducible COX-2. In our previous study, up-regulation of COX-2 has been shown to induce PGE<sub>2</sub> synthesis by TNF- $\alpha$  [18]. Therefore, the synthesis of PGE<sub>2</sub>

is a good index of AA release that is more sensitive than [<sup>3</sup>H]AA mobilization [18]. We further tested the effect of TNF- $\alpha$  on PGE<sub>2</sub> synthesis as a parameter of cPLA<sub>2</sub> activity. As shown in Fig. 1C, TNF- $\alpha$  induced a time-dependent increase in PGE<sub>2</sub> synthesis. These results suggested that TNF- $\alpha$  induces cPLA<sub>2</sub> expression associated with PGE<sub>2</sub> generation in HPAEpiCs.

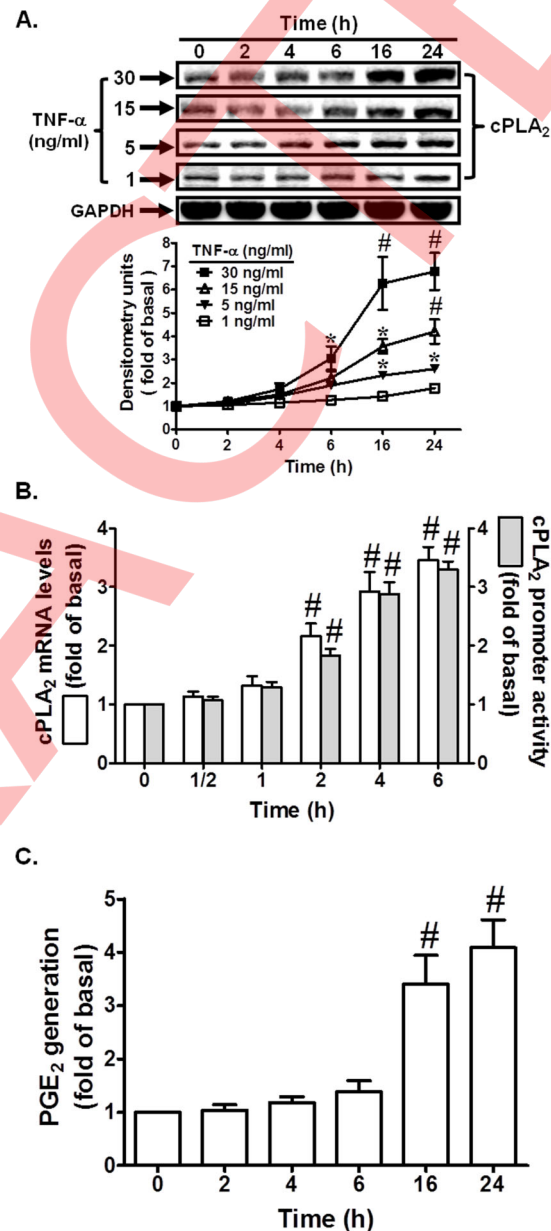

**Figure 1. TNF- $\alpha$  induces cPLA<sub>2</sub> protein and mRNA expression.** Cells were incubated with TNF- $\alpha$  for the indicated time intervals. (A) The protein levels of cPLA<sub>2</sub> were determined by Western blot, (B) the mRNA levels of cPLA<sub>2</sub> were determined by real-time PCR, and the promoter activity of cPLA<sub>2</sub> was determined in the cell lysates. (C) Cells were incubated with TNF- $\alpha$  (30 ng/ml) for the indicated time intervals. The media were collected and analyzed for PGE<sub>2</sub> release. Data are expressed as mean  $\pm$  S.E.M. of three independent experiments. \* $P < 0.05$ ; # $P < 0.01$ , as compared with the cells exposed to vehicle alone. doi:10.1371/journal.pone.0072783.g001



### TNF- $\alpha$ induces cPLA<sub>2</sub> expression via TNFR1 in HPAEpiCs

To further determine whether TNF- $\alpha$ -induced cPLA<sub>2</sub> expression required transcription or translation, cells were stimulated with TNF- $\alpha$  (30 ng/ml) in the presence of an inhibitor of transcriptional level, actinomycin D (Act. D) or translational level, cycloheximide (CHI) and cPLA<sub>2</sub> protein expression was determined by Western blot. As shown in Figs. 2A and B, TNF- $\alpha$ -mediated cPLA<sub>2</sub> protein expression and PGE<sub>2</sub> release was abolished by either Act. D or CHI in a concentration-dependent manner, while cPLA<sub>2</sub> mRNA levels were only attenuated by Act. D. Taken together, these findings demonstrated that the induction of cPLA<sub>2</sub> expression by TNF- $\alpha$  depends on *de novo* protein synthesis in HPAEpiCs. Most of TNF- $\alpha$  actions are elicited through TNFR1 [29]. Thus, we investigated whether TNF- $\alpha$  induced cPLA<sub>2</sub> expression via TNFR1 in these cells. As shown in Fig. 2C, transfection with TNFR1 siRNA markedly reduced TNFR1 protein expression, and then inhibited TNF- $\alpha$ -induced cPLA<sub>2</sub> expression in HPAEpiCs. Therefore, TNFR1 mainly plays a key role in TNF- $\alpha$ -induced inflammatory responses.

### p42/p44 MAPK is involved in TNF- $\alpha$ -induced cPLA<sub>2</sub> expression in HPAEpiCs

Previous studies demonstrated that TNF- $\alpha$  could induce MAPKs activation in human airway smooth muscle cells [18,20]. Thus, we further investigated whether TNF- $\alpha$ -induced cPLA<sub>2</sub> expression was also mediated via p42/p44 MAPK in HPAEpiCs. As shown in Figs. 3A and B, pretreatment with PD98059 (an inhibitor of MEK1/2) attenuated TNF- $\alpha$ -induced cPLA<sub>2</sub> protein and mRNA expression, and promoter activity. To further ensure that TNF- $\alpha$ -induced cPLA<sub>2</sub> expression was mediated via p42/p44 MAPK, as shown in Fig. 3C, transfection with p42 siRNA significantly down-regulated p42 protein expression and subsequently led to a decrease of cPLA<sub>2</sub> protein expression by TNF- $\alpha$ . Finally, we showed that TNF- $\alpha$  stimulated p42/p44 MAPK phosphorylation in a time-dependent manner, which was reduced by PD98059 during the period of observation (Fig. 3D). These data indicated that MEK1/2-p42/p44 MAPK cascade was involved in TNF- $\alpha$ -induced cPLA<sub>2</sub> expression in HPAEpiCs.

### TNF- $\alpha$ induces cPLA<sub>2</sub> expression via p38 MAPK in HPAEpiCs

cPLA<sub>2</sub> expression induced by LPS has been shown to be mediated through p38 MAPK in canine airway smooth muscle cells [19]. To determine whether p38 MAPK was also involved in TNF- $\alpha$ -induced cPLA<sub>2</sub> expression in HPAEpiCs, a p38 MAPK inhibitor, SB202190 was used. As shown in Figs. 4A and B, pretreatment with SB202190 inhibited TNF- $\alpha$ -induced cPLA<sub>2</sub> protein and mRNA expression, and promoter activity. To further ensure that TNF- $\alpha$ -induced cPLA<sub>2</sub> expression was mediated via p38 MAPK in these cells, as shown in Fig. 4C, transfection with p38 siRNA significantly down-regulated p38 MAPK protein expression and subsequently led to a decrease of cPLA<sub>2</sub> protein expression by TNF- $\alpha$ . Finally, we showed that TNF- $\alpha$  stimulated p38 MAPK phosphorylation in a time-dependent manner, which was reduced by SB202190 during the period of observation (Fig. 4D). These data indicated that p38 MAPK cascade was involved in TNF- $\alpha$ -induced cPLA<sub>2</sub> expression in HPAEpiCs.

### TNF- $\alpha$ enhances cPLA<sub>2</sub> expression via JNK1/2 in HPAEpiCs

Expression of cPLA<sub>2</sub> in lung epithelial cells and non-small cell lung cancer is mediated by Sp1 and c-Jun through JNK1/2

#### A.

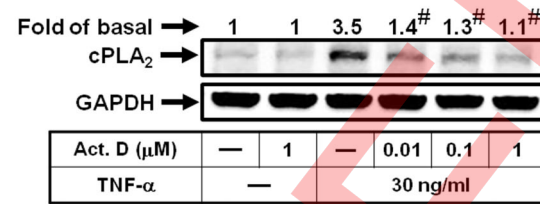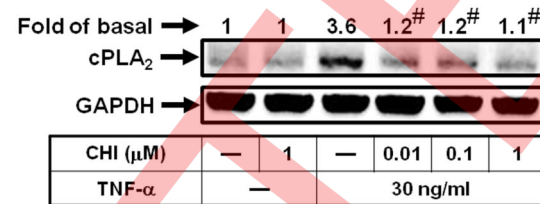

#### B.

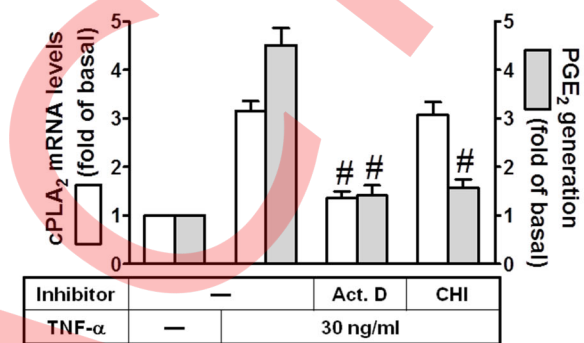

#### C.

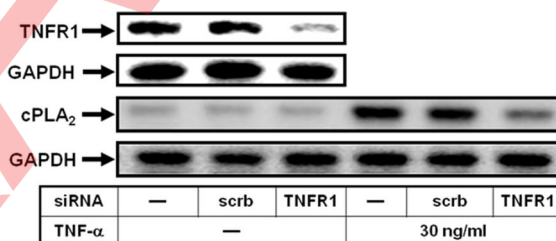

**Figure 2. TNF- $\alpha$  induces cPLA<sub>2</sub> expression via TNFR1 in HPAEpiCs.** (A) Cells were pretreated with Act. D or CHI for 1 h, and then incubated with TNF- $\alpha$  for 24 h. The protein levels of cPLA<sub>2</sub> were determined by Western blot. (B) Cells were pretreated with Act. D (1 μM) or CHI (1 μM) for 1 h, and then incubated with TNF- $\alpha$  for 6 h (for cPLA<sub>2</sub> mRNA levels) or 24 h (for PGE<sub>2</sub> release). cPLA<sub>2</sub> mRNA levels were determined by real-time PCR. The media were collected and analyzed for PGE<sub>2</sub> release. (C) Cells were transfected with scrambled or TNFR1 siRNA, and then incubated with TNF- $\alpha$  for 24 h. The protein expression of TNFR1 and cPLA<sub>2</sub> were determined. Data are expressed as mean  $\pm$  S.E.M. of three independent experiments. # $P$ <0.01, as compared with the cells exposed to TNF- $\alpha$  alone. doi:10.1371/journal.pone.0072783.g002

activation [30]. To characterize the role of JNK1/2 in TNF- $\alpha$ -induced cPLA<sub>2</sub> expression in HPAEpiCs, a selective inhibitor of JNK1/2, SP600125, was used. As shown in Figs. 5A and B, pretreatment with SP600125 blocked TNF- $\alpha$ -induced cPLA<sub>2</sub> protein and mRNA expression, and promoter activity. To further ensure that TNF- $\alpha$ -induced cPLA<sub>2</sub> expression was mediated via JNK1/2 in HPAEpiCs, as shown in Fig. 5C, transfection with JNK2 siRNA significantly down-regulated JNK2 expression and subsequently led to a decrease of cPLA<sub>2</sub> protein expression in response to TNF- $\alpha$ . Finally, we showed that TNF- $\alpha$  stimulated

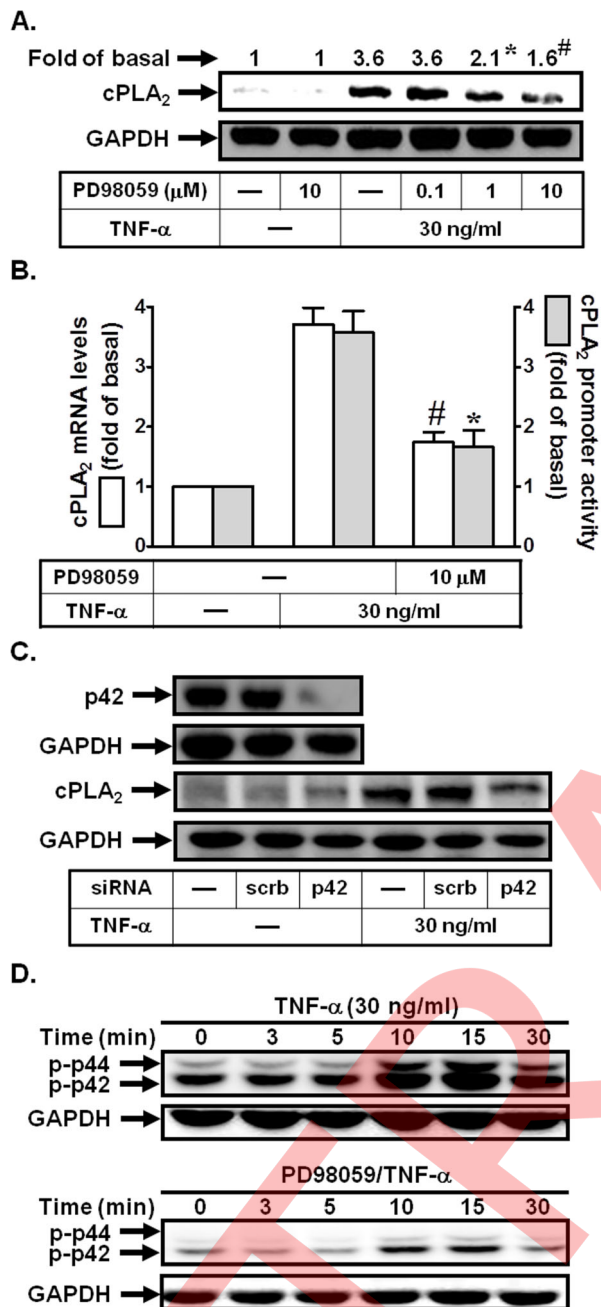

**Figure 3. p42/p44 MAPK is involved in TNF- $\alpha$ -induced cPLA<sub>2</sub> expression.** (A) Cells were pretreated with PD98059 for 1 h, and then incubated with TNF- $\alpha$  for 24 h. The protein levels of cPLA<sub>2</sub> were determined by Western blot. (B) Cells were pretreated with PD98059 (10 μM) for 1 h, and then incubated with TNF- $\alpha$  for 6 h. cPLA<sub>2</sub> mRNA levels and promoter activity were determined. (C) Cells were transfected with scrambled or p42 siRNA, and then incubated with TNF- $\alpha$  for 24 h. The protein levels of p42 and cPLA<sub>2</sub> were determined. (D) Cells were pretreated with or without PD98059 (10 μM) for 1 h, and then incubated with TNF- $\alpha$  for the indicated time intervals. The levels of phospho-p42/p44 MAPK were determined. Data are expressed as mean  $\pm$  S.E.M. of three independent experiments. \* $P$ <0.05; <sup>#</sup> $P$ <0.01, as compared with the cells exposed to TNF- $\alpha$  alone. doi:10.1371/journal.pone.0072783.g003

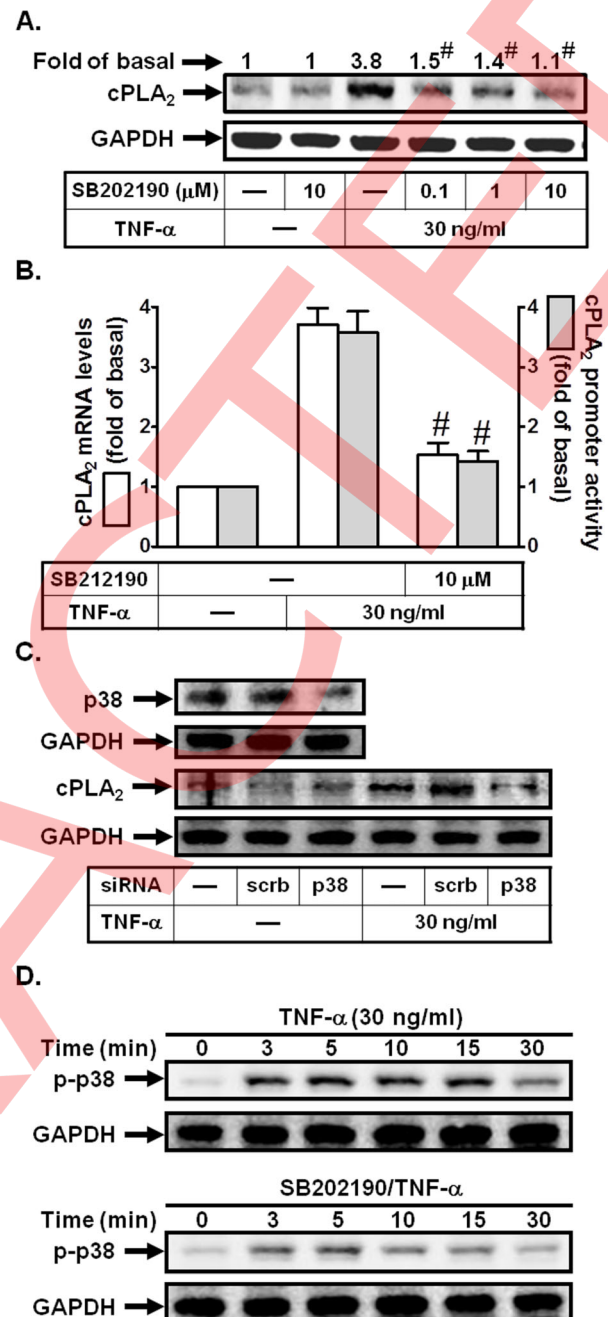

**Figure 4. p38 MAPK is involved in TNF- $\alpha$ -induced cPLA<sub>2</sub> expression.** (A) Cells were pretreated with SB202190 for 1 h, and then incubated with TNF- $\alpha$  for 24 h. The protein levels of cPLA<sub>2</sub> were determined by Western blot. (B) Cells were pretreated with SB202190 (10 μM) for 1 h, and then incubated with TNF- $\alpha$  for 6 h. cPLA<sub>2</sub> mRNA levels and promoter activity were determined. (C) Cells were transfected with scrambled or p38 siRNA, and then incubated with TNF- $\alpha$  for 24 h. The protein levels of p38 and cPLA<sub>2</sub> were determined. (D) Cells were pretreated with or without SB202190 (10 μM) for 1 h, and then incubated with TNF- $\alpha$  for the indicated time intervals. The levels of phospho-p38 MAPK were determined. Data are expressed as mean  $\pm$  S.E.M. of three independent experiments. <sup>#</sup> $P$ <0.01, as compared with the cells exposed to TNF- $\alpha$  alone. doi:10.1371/journal.pone.0072783.g004

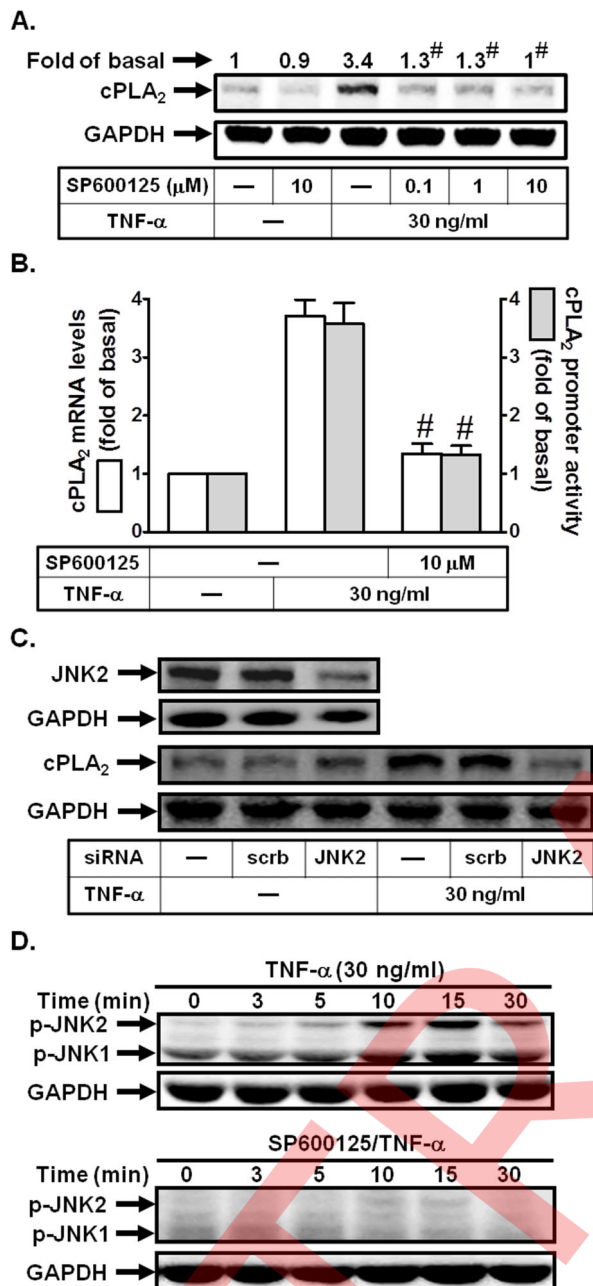

**Figure 5. JNK1/2 is involved in TNF- $\alpha$ -induced cPLA<sub>2</sub> expression.**

(A) Cells were pretreated with SP600125 for 1 h, and then incubated with TNF- $\alpha$  for 24 h. The protein levels of cPLA<sub>2</sub> were determined by Western blot. (B) Cells were pretreated with SP600125 (10 μM) for 1 h, and then incubated with TNF- $\alpha$  for 6 h. cPLA<sub>2</sub> mRNA levels and promoter activity were determined. (C) Cells were transfected with scrambled or JNK2 siRNA, and then incubated with TNF- $\alpha$  for 24 h. The protein levels of JNK2 and cPLA<sub>2</sub> were determined. (D) Cells were pretreated with or without SP600125 (10 μM) for 1 h, and then incubated with TNF- $\alpha$  for the indicated time intervals. The levels of phospho-JNK1/2 were determined. Data are expressed as mean  $\pm$  S.E.M. of three independent experiments. <sup>#</sup>*P* < 0.01, as compared with the cells exposed to TNF- $\alpha$  alone.

doi:10.1371/journal.pone.0072783.g005

JNK1/2 phosphorylation in a time-dependent manner, which was reduced by SP600125 during the period of observation (Fig. 5D). These results suggested that JNK1/2 activation was required for TNF- $\alpha$ -induced cPLA<sub>2</sub> expression in HPAEpiCs.

## AP-1 is involved in TNF- $\alpha$ -induced cPLA<sub>2</sub> expression and PGE<sub>2</sub> release in HPAEpiCs

AP-1 is a transcription factor which is a heterodimeric protein composed of proteins belonging to the c-Fos, c-Jun, ATF, and JDP families [21], which regulates gene expression induced by various stimuli, including cytokines, growth factors, stress, and bacterial and viral infections [21]. To characterize the role of AP-1 in TNF- $\alpha$ -induced cPLA<sub>2</sub> expression in HPAEpiCs, a selective inhibitor of AP-1, Tanshinone IIA, was used. As shown in Figs. 6A and B, pretreatment with Tanshinone IIA blocked TNF- $\alpha$ -induced cPLA<sub>2</sub> protein and mRNA expression, and promoter activity. To further ensure that TNF- $\alpha$ -induced cPLA<sub>2</sub> expression was mediated via AP-1 in HPAEpiCs, as shown in Fig. 6C, transfection with c-Jun or c-Fos siRNA significantly down-regulated c-Jun or c-Fos expression and subsequently led to a decrease of cPLA<sub>2</sub> protein expression by TNF- $\alpha$ . To further confirm the role of AP-1 in TNF- $\alpha$ -mediated cPLA<sub>2</sub> promoter induction, point-mutated AP-1 cPLA<sub>2</sub> promoter construct was used. As shown in Fig. 6D, TNF- $\alpha$ -stimulated cPLA<sub>2</sub> promoter activity was prominently lost in HPAEpiCs transfected with point-mutated AP-1 cPLA<sub>2</sub> promoter. Finally, we found that pretreatment with PD98059, SB202190, SP600125, or Tanshinone IIA markedly reduced TNF- $\alpha$ -induced PGE<sub>2</sub> release in these cells (Fig. 6E). Thus, these data suggested that TNF- $\alpha$  induces cPLA<sub>2</sub> expression via an AP-1 signaling in HPAEpiCs.

## TNF- $\alpha$ stimulates p300/ATF2/c-Jun/c-Fos complex formation in HPAEpiCs

ATF2 is a member of the ATF/cyclic AMP-responsive element binding protein family of transcription factors and implicated in inflammatory responses [31]. To ensure that TNF- $\alpha$ -induced cPLA<sub>2</sub> expression was mediated via ATF2 in HPAEpiCs, as shown in Fig. 7A, transfection with ATF2 siRNA significantly down-regulated ATF2 expression and subsequently led to a decrease of cPLA<sub>2</sub> protein expression by TNF- $\alpha$ . On the other hand, we demonstrated that TNF- $\alpha$  time-dependently induced c-Fos and c-Jun protein expression or c-Jun and ATF2 phosphorylation in these cells (Fig. 7B). We further investigated the relationship between MAPKs and AP-1 in TNF- $\alpha$ -stimulated HPAEpiCs. As shown in Fig. 7C, TNF- $\alpha$ -enhanced ATF2 phosphorylation was inhibited by SB202190, but not PD98059 and SP600125. However, c-Jun phosphorylation stimulated by TNF- $\alpha$  was inhibited by SP600125, but not PD98059 and SB202190. Thus, we suggested that TNF- $\alpha$ -induced cPLA<sub>2</sub> expression is mediated through AP-1 activation which is regulated by p38 MAPK and JNK1/2 but not p42/p44 MAPK in HPAEpiCs.

The transcriptional co-activator p300 displays an intrinsic HAT activity which participates in transcriptional activation through the destabilization of nucleosome structure. p300 is involved in the activity of several transcription factors that are nuclear endpoints of intracellular signal transduction pathways [20]. Moreover, co-immunoprecipitation study revealed that TNF- $\alpha$ -stimulated p300 directly associated with c-Fos, c-Jun, or ATF2 in a time-dependent manner with a maximal response within 30 min. Finally, the *in vivo* recruitment of p300, ATF2, c-Fos, and c-Jun to the cPLA<sub>2</sub> promoter was assessed by a ChIP assay. *In vivo* binding of p300, ATF2, c-Fos, and c-Jun to the cPLA<sub>2</sub> promoter occurred as early as 15 min and was sustained for 30 min following TNF- $\alpha$  stimulation (Fig. 7E).

## TNF- $\alpha$ induces leukocyte accumulation in BAL and cPLA<sub>2</sub> mRNA expression in mice via MAPKs and AP-1

TNF- $\alpha$  has been shown to induce ROS generation via NADPH oxidase activation, which in turn initiates the activation of various



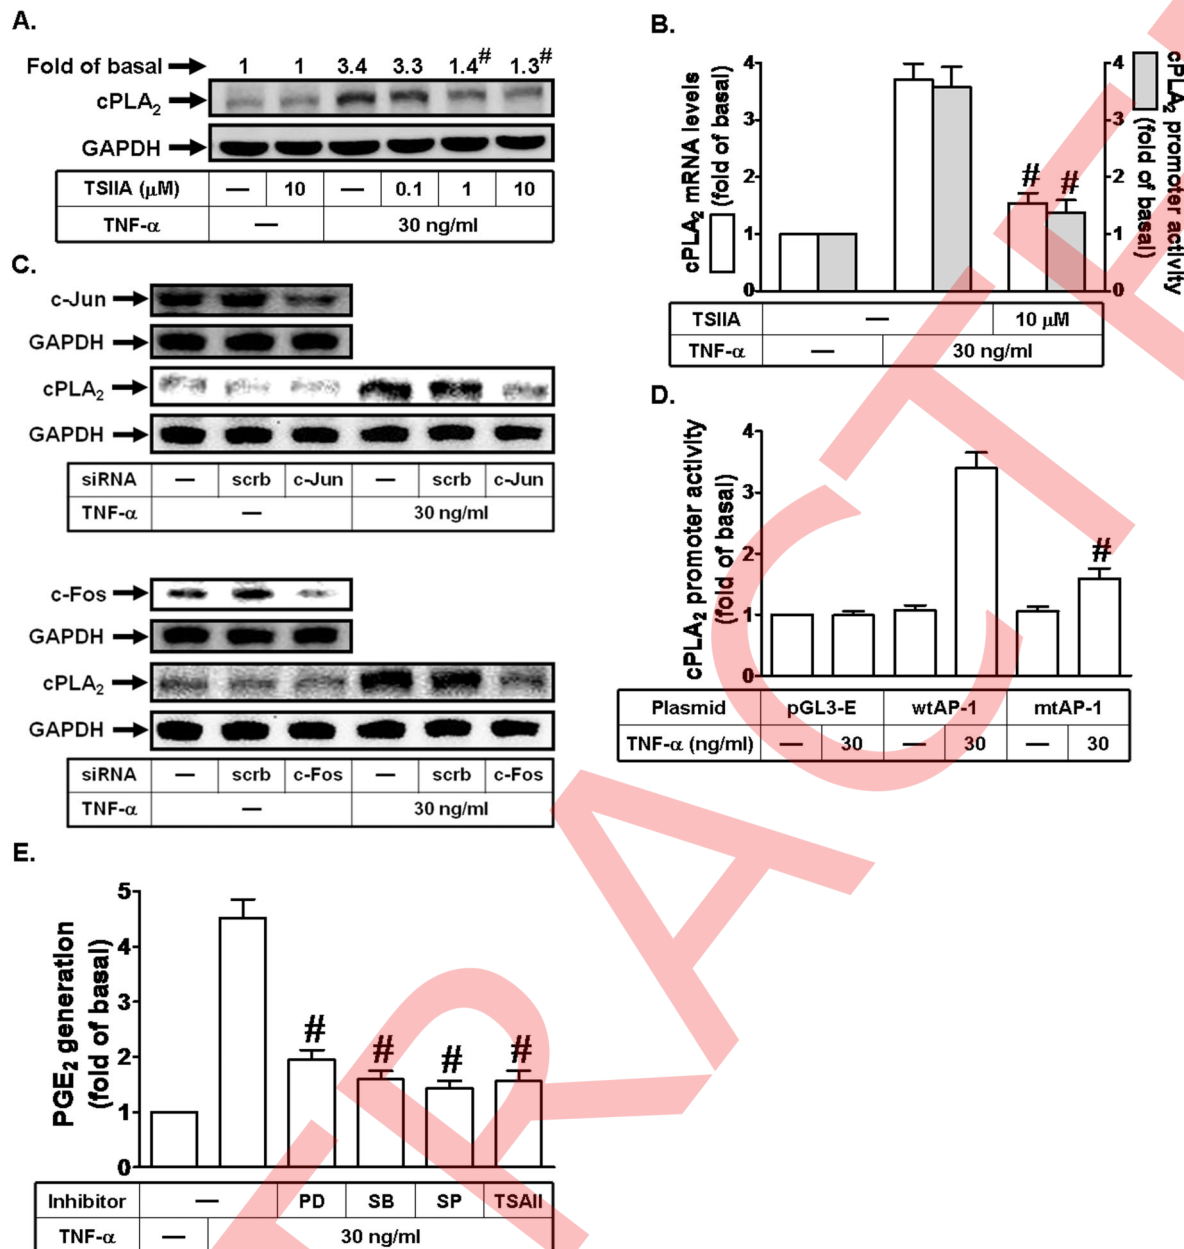

**Figure 6. AP-1 is involved in TNF- $\alpha$ -induced cPLA<sub>2</sub> expression.** (A) Cells were pretreated with Tanshinone IIA (TSIIA) for 1 h, and then incubated with TNF- $\alpha$  for 24 h. The protein levels of cPLA<sub>2</sub> were determined by Western blot. (B) Cells were pretreated with Tanshinone IIA (TSIIA), and then incubated with TNF- $\alpha$  for 6 h. cPLA<sub>2</sub> mRNA levels and promoter activity were determined. (C) Cells were transfected with scrambled, c-Jun, or c-Fos siRNA, and then incubated with TNF- $\alpha$  for 24 h. The protein levels of c-Jun, c-Fos, and cPLA<sub>2</sub> were determined. (D) Cells were transfected with pGL3-empty, wild-type cPLA<sub>2</sub> promoter, or AP-1-mutated cPLA<sub>2</sub> promoter, and then incubated with TNF- $\alpha$  for 6 h. The promoter activity of cPLA<sub>2</sub> was determined in the cell lysates. (E) Cells were pretreated with PD98059 (10  $\mu$ M), SB202190 (10  $\mu$ M), SP600125 (10  $\mu$ M), or Tanshinone IIA (TSIIA; 10  $\mu$ M) for 1 h, and then incubated with TNF- $\alpha$  for 24 h. The media were collected and analyzed for PGE<sub>2</sub> release. Data are expressed as mean  $\pm$  S.E.M. of three independent experiments. <sup>#</sup> $P$ <0.01, as compared with the cells exposed to TNF- $\alpha$  alone (A, B, and E). <sup>#</sup> $P$ <0.01, as compared with cells transfected with wild-type cPLA<sub>2</sub> promoter stimulated by TNF- $\alpha$  (D). doi:10.1371/journal.pone.0072783.g006

signaling pathways, including PKCs, PI3K/Akt, and MAPKs or transcription factors, such as NF- $\kappa$ B and AP-1, and ultimately induces expression of cPLA<sub>2</sub>. Moreover, cPLA<sub>2</sub> induction may trigger airway and pulmonary diseases, such as asthma and COPD [1]. To further confirm the effects of TNF- $\alpha$  on animal models, mice were (i.p.) injected with PD98059, SB202190, SP600125, or Tanshinone IIA, and then administrated by oropharyngeal route with TNF- $\alpha$  for 24 h. As shown in Fig. 8A, TNF- $\alpha$  markedly

induced cPLA<sub>2</sub> mRNA expression in lung tissues of mice, which was reduced by PD98059, SB202190, SP600125, or Tanshinone IIA. In addition, we also showed that PD98059, SB202190, SP600125, Tanshinone IIA, or AACOCF<sub>3</sub> (an inhibitor of cPLA<sub>2</sub>) reduced TNF- $\alpha$ -induced leukocyte count in BAL fluid of mice (Fig. 8B). PGE<sub>2</sub>, one of the major PGs products, exerts its biological activities by binding to specific cell surface receptors, designated PGE<sub>2</sub> receptors (EPs). To investigate whether PGE<sub>2</sub>

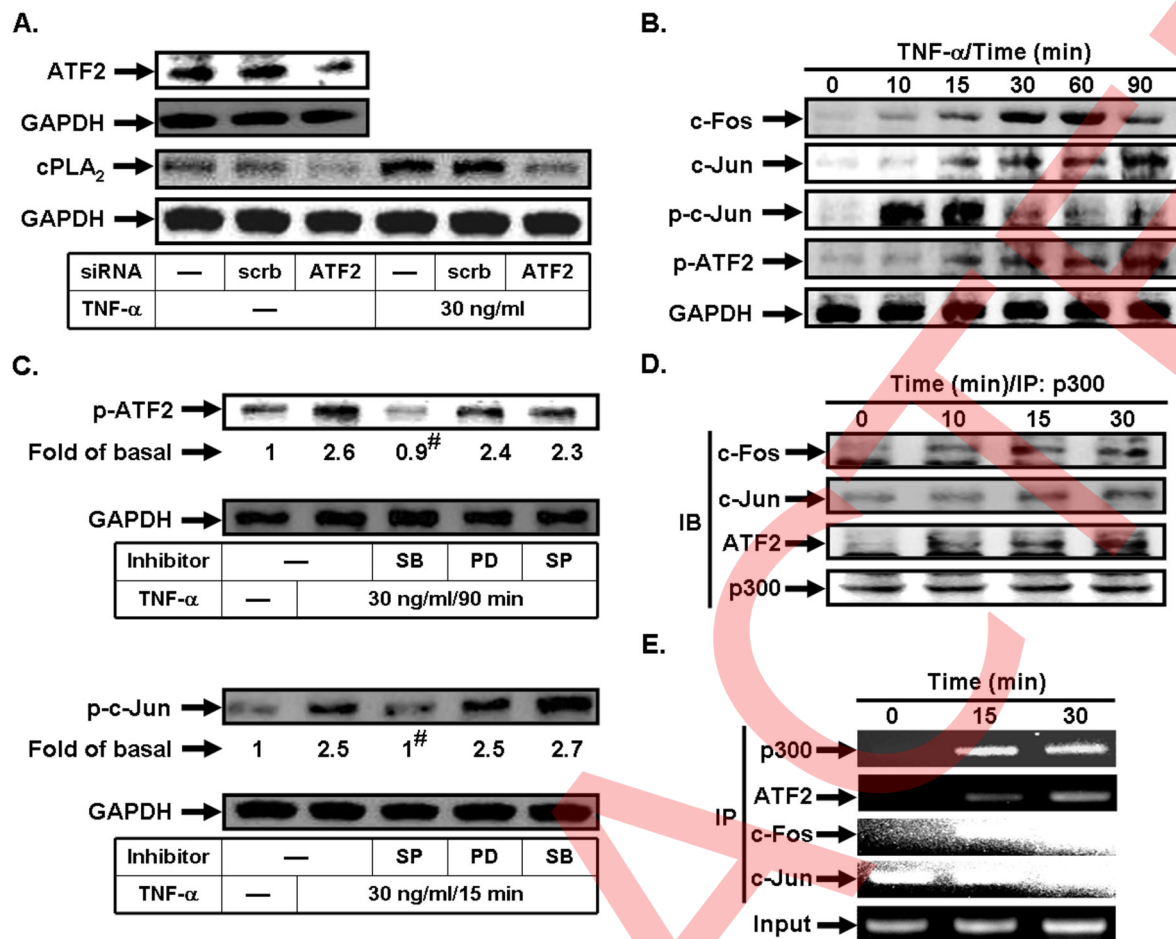

**Figure 7. TNF- $\alpha$  stimulates p300/ATF2/c-Jun/c-Fos complex formation.** (A) Cells were transfected with scrambled or ATF2 siRNA, and then incubated with TNF- $\alpha$  for 24 h. The protein levels of ATF2 and cPLA<sub>2</sub> were determined. (B) Cells were incubated with TNF- $\alpha$  for the indicated time intervals. The levels of c-Fos, c-Jun, phospho-c-Jun, and phospho-ATF2 were determined. (C) Cells were pretreated with PD98059, SB202190, or SP600125, and then incubated with TNF- $\alpha$  for 90 min or 15 min. The levels of phospho-ATF2 and phospho-c-Jun were determined. (D) Cells were incubated with TNF- $\alpha$  for the indicated time intervals. The cell lysates were subjected to immunoprecipitation using an anti-p300 antibody, and then the immunoprecipitates were analyzed by Western blot using an anti-c-Fos, anti-c-Jun, anti-ATF2, or anti-p300 antibody. (E) Cells were treated with TNF- $\alpha$  for the indicated time intervals, and then ChIP assay was performed. Chromatin was immunoprecipitated using an anti-p300, anti-ATF2, anti-c-Fos, or anti-c-Jun antibody. One percent of the precipitated chromatin was assayed to verify equal loading (Input). Data are expressed as mean  $\pm$  S.E.M. of three independent experiments.  $^{\#}P < 0.01$ , as compared with the cells exposed to TNF- $\alpha$  alone. doi:10.1371/journal.pone.0072783.g007

could induce leukocyte count in BAL fluid of mice, AH 6809 (an EP1 and EP2 receptor antagonist), SC-19220 (an EP1 receptor antagonist), or GW627368X (an EP4 receptor antagonist) was used. As shown in Fig. 8C, these three EP receptor antagonists reduced TNF- $\alpha$ -induced leukocyte count in BAL fluid of mice. These data suggested that TNF- $\alpha$  may promote leukocyte accumulation and lung inflammation via cPLA<sub>2</sub>-mediated PGE<sub>2</sub> release to cause airway and pulmonary diseases, such as asthma and COPD.

## Discussion

Asthma and COPD are pulmonary disorders characterized by various degrees of inflammation and tissue remodeling. Up-regulation of cPLA<sub>2</sub> expression by mesenchymal cells in several extra-pulmonary sites may play a key role in generation of PGE<sub>2</sub>, known as a biologically active lipid mediator implicated in inflammatory responses [32]. TNF- $\alpha$  has been confirmed to induce the late-phase airway hyperresponsiveness and inflamma-

tion mediated through activation of cPLA<sub>2</sub> [33], but little is known about the intracellular signaling pathways leading to its expression. TNF- $\alpha$  has also been shown to activate MAPKs pathways in several cell types [18,34]. In addition, AP-1 activity is regulated by multiple mechanisms, including phosphorylation by various MAPKs [22]. Among MAPKs, JNK1/2 predominantly plays an important role in TNF- $\alpha$ -induced AP-1 activity, which contributes to the induction of TNF- $\alpha$ -targeted genes [23]. However, in HPAEpiCs, whether TNF- $\alpha$ -induced cPLA<sub>2</sub> expression was mediated through the activation of MAPKs and AP-1 was still unknown. In this study, TNF- $\alpha$  induced cPLA<sub>2</sub> expression and PGE<sub>2</sub> production which were attenuated by pretreatment with the inhibitors of MEK1/2 (PD98059), p38 MAPK (SB202190), JNK1/2 (SP600125), and AP-1 (Tanshinone IIA) or transfection with siRNAs of p42, p38, JNK2, c-Fos, c-Jun, ATF2, and TNFR1. Here, our results suggested that in HPAEpiCs, TNF- $\alpha$ -induced cPLA<sub>2</sub> expression associated with PGE<sub>2</sub> release was, at least in part, mediated through JNK1/2- and p38 MAPK-dependent p300-AP-1 signaling pathway. These results demonstrated that



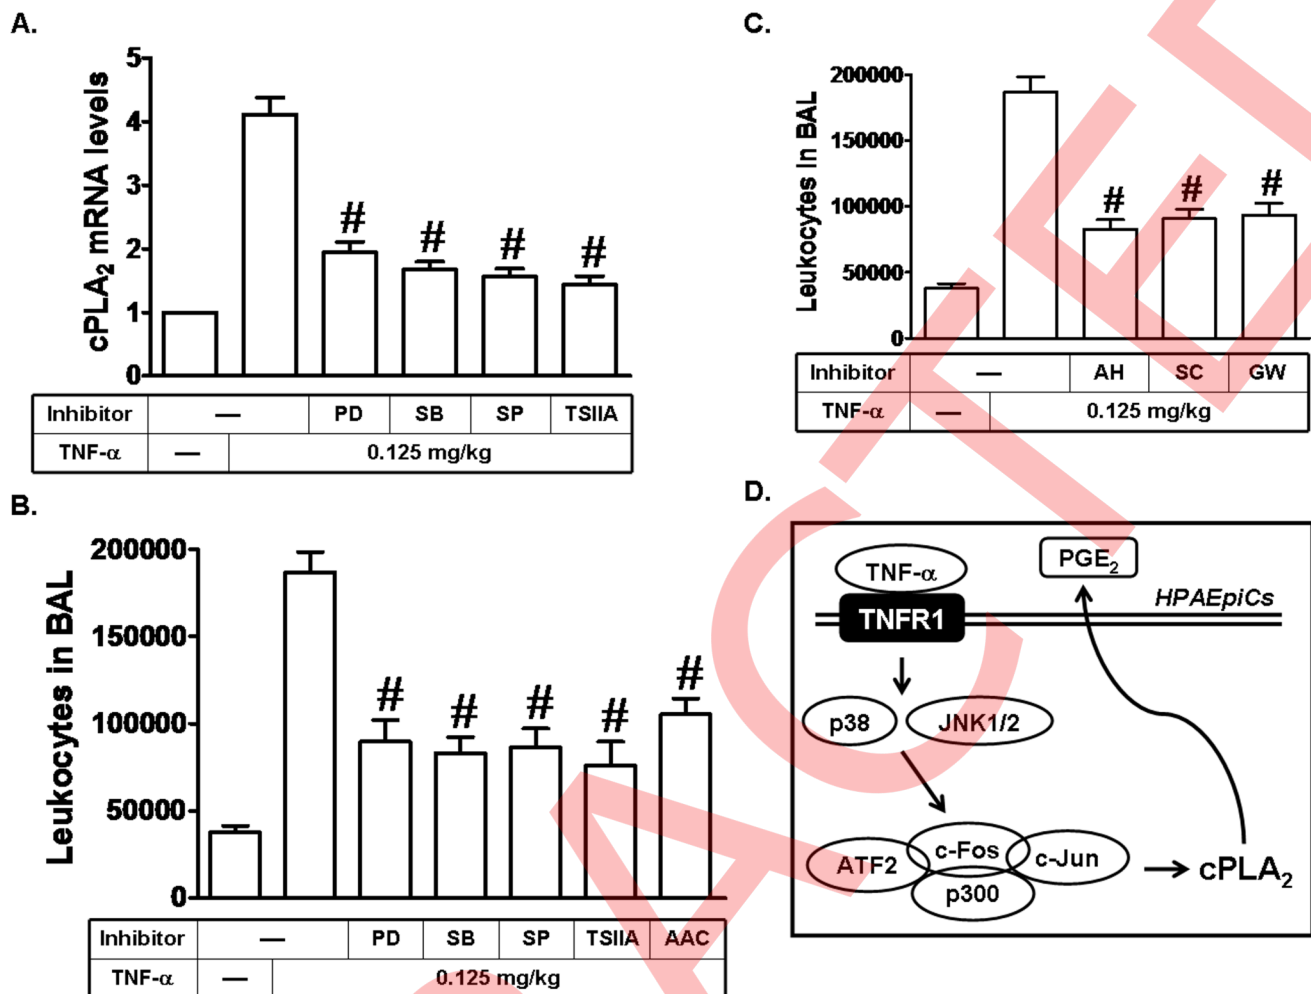

**Figure 8. TNF- $\alpha$  induces leukocyte accumulation in BAL and cPLA<sub>2</sub> mRNA expression in mice via MAPKs and AP-1.** (A) Mice were i.p. given one dose of PD98059, SB202190, SP600125, or Tanshinone IIA (2 mg/kg) for 1 h before TNF- $\alpha$  treatment, and sacrificed after 24 h. Lung tissues were homogenized to extract mRNA. The levels of cPLA<sub>2</sub> mRNA were determined by real-time PCR. (B, C) Mice were i.p. given one dose of PD98059, SB202190, SP600125, Tanshinone IIA, AACOCF<sub>3</sub>, AH 6809, SC-19220, or GW627368X (2 mg/kg) for 1 h before TNF- $\alpha$  treatment, and sacrificed after 24 h. BAL fluid was acquired and leukocyte count was determined by a hemocytometer. (D) Schematic representation of the signaling pathways involved in the TNF- $\alpha$ -induced cPLA<sub>2</sub> expression in HPAEpiCs. TNF- $\alpha$ -induced cPLA<sub>2</sub> expression and PGE<sub>2</sub> release are mediated through p38 MAPK- and JNK1/2-dependent p300/c-Fos/c-Jun/ATF2 complex formation in HPAEpiCs. doi:10.1371/journal.pone.0072783.g008

MAPKs and AP-1 may be the critical components implicated in cPLA<sub>2</sub> expression and PGE<sub>2</sub> synthesis in TNF- $\alpha$ -challenged HPAEpiCs.

Accumulating evidence demonstrates that TNF- $\alpha$  may activate downstream protein kinases leading to the expression of inflammatory proteins [18,29]. All known responses to TNF- $\alpha$  are triggered by binding to one of two distinct receptors, designated as TNFR1 and TNFR2 [29]. However, based on cell culture experiments and studies with receptor knockout mice, both the proinflammatory and the programmed cell death pathways that are activated by TNF- $\alpha$ , and associated with tissue injury, are largely mediated through TNFR1 [29,35]. In contrast, TNFR2 has been shown to mediate signals that promote tissue repair and angiogenesis [36]. Indeed, in HPAEpiCs, we also showed that TNFR1 plays a key role in mediating TNF- $\alpha$ -induced inflammatory responses.

Several extracellular stimuli elicit a broad spectrum of biological responses mediated through activation of MAPKs, including p42/p44 MAPK, p38 MAPK, and JNK1/2. Since TNF- $\alpha$  plays an

important role in different cellular responses, the activation of these MAPKs is not necessarily restricted to TNF- $\alpha$ -induced cPLA<sub>2</sub> expression. For example, activation of JNK1/2 and p42/p44 MAPK is required for up-regulation of cPLA<sub>2</sub> in response to oncogenic Ras in normal epithelial cells [16]. In canine airway smooth muscle cells, up-regulation of cPLA<sub>2</sub> by LPS is mediated through these MAPKs pathways [19]. Moreover, IL-1 $\beta$  induces expression of cPLA<sub>2</sub> in human airway smooth muscle cells, which is regulated by p38 MAPK and JNK1/2, but not p42/p44 MAPK [37]. In the present study, our results demonstrated that activation of p42/p44 MAPK, p38 MAPK, or JNK1/2 was necessary for TNF- $\alpha$ -induced cPLA<sub>2</sub> expression and PGE<sub>2</sub> release in HPAEpiCs. These results were consistent with the reports indicating that activation of MAPKs plays a pivotal role in the expression of cPLA<sub>2</sub> in various cell types [19,20].

AP-1 is a dimeric transcription factor comprising proteins from several families whose common denominator is the possession of basic leucine zipper (bZIP) domains that are essential for dimerization and DNA binding. It has been well established that

inflammatory responses following exposure to extracellular stimuli are highly dependent on activation of AP-1 which plays an important role in the expression of several target genes [22]. Our group has indicated that IL-1 $\beta$  could induce cPLA<sub>2</sub> expression via p42/p44 MAPK- and JNK1/2-dependent AP-1 activation in RA synovial fibroblasts (RASFs) [38]. In addition, we also demonstrated that cigarette smoke extract (CSE) induces cPLA<sub>2</sub> expression via MAPKs, AP-1, and NF- $\kappa$ B in human tracheal smooth muscle cells [39]. Here, in HPAEpiCs, we also found that TNF- $\alpha$ -induced cPLA<sub>2</sub> expression and PGE<sub>2</sub> release was decreased via AP-1 inhibition. On the other hand, we also demonstrated that TNF- $\alpha$  could enhance c-Jun and c-Fos protein expression, which may promote TNF- $\alpha$ -mediated induction of inflammatory genes. The transcriptional activity of c-Jun is regulated by phosphorylation at Ser<sup>63</sup> and Ser<sup>73</sup> through JNK1/2 [22]. The transcription factor ATF2 (also called CRE-BP1) binds to both AP-1 and CRE DNA response elements and is a member of the ATF/CREB family of leucine zipper proteins. Various forms of cellular stresses, including genotoxic agents, inflammatory cytokines, and UV irradiation, stimulate the transcriptional activity of ATF2. Cellular stresses activate ATF2 by phosphorylation of Thr<sup>69</sup> and Thr<sup>71</sup> [21,22]. Moreover, in HPAEpiCs, TNF- $\alpha$  could stimulate c-Jun and ATF2 phosphorylation in a time-dependent manner. We further established that p38 MAPK, but not p42/p44 MAPK and JNK1/2 plays a key role in mediating TNF- $\alpha$ -induced ATF2 activation in these cells. However, TNF- $\alpha$ -induced c-Jun phosphorylation was regulated via JNK1/2 activation. Although p42/p44 MAPK was involved in TNF- $\alpha$ -induced cPLA<sub>2</sub> expression, which was not mediated through activation of ATF2 and c-Jun in HPAEpiCs. In the future, we will investigate whether p42/p44 MAPK may regulate other transcription factors, such as NF- $\kappa$ B or Elk-1, leading to cPLA<sub>2</sub> expression.

In non-small cell lung cancer cells, cPLA<sub>2</sub> gene expression can be regulated by various transcription factors, including Sp1 and c-Jun [30]. Both Sp1 and c-Jun have been reported to interact with co-activator, p300, one of HAT members [40,41]. HATs, such as p300 and CREB binding protein (CBP) act as protein bridges, thereby connecting different transcriptional activators via protein-protein interactions to the basal transcriptional machinery, including transcription factor IIB (TFIIB), TATA-binding protein, and the RNA polymerase II complex [42]. They also function as a scaffolding protein which builds a multi-component transcriptional

regulatory complex. Raised activity of intrinsic HAT may cause remodeling of chromatin structure by acetylation of the NH<sub>2</sub> terminus of core nucleosomal histones [42]. Chromatin remodeling after p300/CBP associated with histone acetylation is believed to participate in active transcription of pro-inflammatory genes upon stimulation by various mediators. Here, we found that TNF- $\alpha$  time-dependently induced p300/c-Fos/c-Jun/ATF2 complex formation in HPAEpiCs. Finally, we also established that TNF- $\alpha$  markedly induced *in vivo* binding of p300, ATF2, c-Fos, and c-Jun to the cPLA<sub>2</sub> promoter.

Based on the observation from literatures and our findings, Fig. 8D reveals a model for the signaling mechanisms implicated in TNF- $\alpha$ -induced cPLA<sub>2</sub> expression and PGE<sub>2</sub> release in HPAEpiCs. Indeed, previous study showed that cigarette smoke extract (CSE) induced cPLA<sub>2</sub> expression in airway smooth muscle cells via the NADPH oxidase-dependent p42/p44 MAPK and p38 MAPK/c-Fos and JNK1/2/c-Jun/p300 pathways [39]. In addition, our group also indicated that TNF- $\alpha$  induced cPLA<sub>2</sub> expression through MAPKs, and then the activated MAPKs regulated the activity of p300 and acetylation of histone H4 and hence led to cPLA<sub>2</sub> expression [20]. Chi et al. demonstrated that IL-1 $\beta$  induced cPLA<sub>2</sub> expression via activation of p42/p44 MAPK and JNK1/2, which further stimulated AP-1 activation in rheumatoid arthritis synovial fibroblasts [38]. However, this study is the first to demonstrate that in HPAEpiCs, the mechanisms underlying TNF- $\alpha$ -mediated activation of MAPKs and AP-1 was required for the expression of cPLA<sub>2</sub>. Finally, association of p300, ATF2, c-Jun, and c-Fos led to cPLA<sub>2</sub> gene transcription. The mechanisms by which TNF- $\alpha$  induced cPLA<sub>2</sub> expression may be an important link in the pathogenesis of lung inflammatory diseases. Therefore, understanding the mechanisms underlying TNF- $\alpha$ -induced cPLA<sub>2</sub> expression in HPAEpiCs is important to develop new therapeutic strategies.

## Acknowledgments

We thank Ms. Chi-Yin Lee for her technical assistance.

## Author Contributions

Conceived and designed the experiments: ITL CCL CMY. Performed the experiments: ITL SEC LDH YCH. Analyzed the data: HCT ITL LDH CMY. Contributed reagents/materials/analysis tools: ITL CCL SEC LDH YCH. Wrote the paper: ITL CCL CMY.

## References

- Lee IT, Yang CM (2012) Role of NADPH oxidase/ROS in pro-inflammatory mediators-induced airway and pulmonary diseases. *Biochem Pharmacol* 84: 581–590.
- Barnes PJ (1989) New concepts in the pathogenesis of bronchial hyperresponsiveness and asthma. *J Allergy Clin Immunol* 83: 1013–1026.
- Henderson WR Jr, Tang LO, Chu SJ, Tsao SM, Chiang GK, et al. (2002) A role for cysteinyl leukotrienes in airway remodeling in a mouse asthma model. *Am J Respir Crit Care Med* 165: 108–116.
- Borsch-Haubold AG, Bartoli F, Asselin J, Dudler T, Kramer RM, et al. (1998) Identification of the phosphorylation sites of cytosolic phospholipase A<sub>2</sub> in agonist-stimulated human platelets and HeLa cells. *J Biol Chem* 273: 4449–4458.
- Hsieh HL, Wu CY, Hwang TL, Yen MH, Parker P, et al. (2006) BK-induced cytosolic phospholipase A<sub>2</sub> expression via sequential PKC- $\delta$ , p42/p44 MAPK, and NF- $\kappa$ B activation in rat brain astrocytes. *J Cell Physiol* 206: 246–254.
- Yang CM, Chien CS, Hsiao LD, Luo SF, Wang CC (2002) Interleukin-1 $\beta$ -induced cyclooxygenase-2 expression is mediated through activation of p42/44 and p38 MAPKs, and NF- $\kappa$ B pathways in canine tracheal smooth muscle cells. *Cell Signal* 14: 899–911.
- Six DA, Dennis EA (2000) The expanding superfamily of phospholipase A<sub>2</sub> enzymes: classification and characterization. *Biochim Biophys Acta* 1488: 1–19.
- Leslie CC (1997) Properties and regulation of cytosolic phospholipase A<sub>2</sub>. *J Biol Chem* 272: 16709–16712.
- Lin LL, Wartmann M, Lin AY, Knopf JL, Seth A, et al. (1993) cPLA<sub>2</sub> is phosphorylated and activated by MAP kinase. *Cell* 72: 269–278.
- Gijon MA, Spencer DM, Siddiqi AR, Bonventre JV, Leslie CC (2000) Cytosolic phospholipase A<sub>2</sub> is required for macrophage arachidonic acid release by agonists that Do and Do not mobilize calcium. Novel role of mitogen-activated protein kinase pathways in cytosolic phospholipase A<sub>2</sub> regulation. *J Biol Chem* 275: 20146–20156.
- Nagase T, Uozumi N, Ishii S, Kume K, Izumi T, et al. (2000) Acute lung injury by sepsis and acid aspiration: a key role for cytosolic phospholipase A<sub>2</sub>. *Nat Immunol* 1: 42–46.
- Uozumi N, Kume K, Nagase T, Nakatani N, Ishii S, et al. (1997) Role of cytosolic phospholipase A<sub>2</sub> in allergic response and parturition. *Nature* 390: 618–622.
- Dieter P, Kolada A, Kamionka S, Schadow A, Kaszkin M (2002) Lipopolysaccharide-induced release of arachidonic acid and prostaglandins in liver macrophages: regulation by Group IV cytosolic phospholipase A<sub>2</sub>, but not by Group V and Group IIA secretory phospholipase A<sub>2</sub>. *Cell Signal* 14: 199–204.
- Gilroy DW, Newson J, Sawmynaden P, Willoughby DA, Croxtall JD (2004) A novel role for phospholipase A<sub>2</sub> isoforms in the checkpoint control of acute inflammation. *FASEB J* 18: 489–498.
- Hulkower KI, Wertheimer SJ, Levin W, Coffey JW, Anderson CM, et al. (1994) Interleukin-1 $\beta$  induces cytosolic phospholipase A<sub>2</sub> and prostaglandin H synthase in rheumatoid synovial fibroblasts. Evidence for their roles in the production of prostaglandin E<sub>2</sub>. *Arthritis Rheum* 37: 653–661.

16. Van Putten V, Refaat Z, Dessev C, Blaine S, Wick M, et al. (2001) Induction of cytosolic phospholipase A<sub>2</sub> by oncogenic Ras is mediated through the JNK and ERK pathways in rat epithelial cells. *J Biol Chem* 276: 1226–1232.
17. Marshall CJ (1994) MAP kinase kinase kinase, MAP kinase kinase and MAP kinase. *Curr Opin Genet Dev* 4: 82–89.
18. Lin CC, Hsiao LD, Chien CS, Lee CW, Hsieh JT, et al. (2004) Tumor necrosis factor- $\alpha$ -induced cyclooxygenase-2 expression in human tracheal smooth muscle cells: involvement of p42/p44 and p38 mitogen-activated protein kinases and nuclear factor- $\kappa$ B. *Cell Signal* 16: 597–607.
19. Luo SF, Lin WN, Yang CM, Lee CW, Liao CH, et al. (2006) Induction of cytosolic phospholipase A<sub>2</sub> by lipopolysaccharide in canine tracheal smooth muscle cells: involvement of MAPKs and NF- $\kappa$ B pathways. *Cell Signal* 18: 1201–1211.
20. Lee CW, Lin CC, Lee IT, Lee HC, Yang CM (2011) Activation and induction of cytosolic phospholipase A<sub>2</sub> by TNF- $\alpha$  mediated through Nox2, MAPKs, NF- $\kappa$ B, and p300 in human tracheal smooth muscle cells. *J Cell Physiol* 226: 2103–2114.
21. Vesely PW, Staber PB, Hoefler G, Kenner L (2009) Translational regulation mechanisms of AP-1 proteins. *Mutat Res* 682: 7–12.
22. Shaulian E (2010) AP-1—The Jun proteins: Oncogenes or tumor suppressors in disguise? *Cell Signal* 22: 894–899.
23. Karin M, Gallagher E (2009) TNFR signaling: ubiquitin-conjugated TRAF6 signals control stop-and-go for MAPK signaling complexes. *Immunol Rev* 228: 225–240.
24. Joo M, Wright JG, Hu NN, Sadikot RT, Park GY, et al. (2007) Yin Yang 1 enhances *cyclooxygenase-2* gene expression in macrophages. *Am J Physiol Lung Cell Mol Physiol* 292: L1219–L1226.
25. Deng WG, Zhu Y, Wu KK (2004) Role of p300 and PCAF in regulating cyclooxygenase-2 promoter activation by inflammatory mediators. *Blood* 103: 2135–2142.
26. Lee CW, Lin CC, Lin WN, Liang KC, Luo SF, et al. (2007) TNF- $\alpha$  induces MMP-9 expression via activation of Src/EGFR, PDGFR/PI3K/Akt cascade and promotion of NF- $\kappa$ B/p300 binding in human tracheal smooth muscle cells. *Am J Physiol Lung Cell Mol Physiol* 292: L799–L812.
27. Cao D, Bromberg PA, Samet JM (2007) COX-2 expression induced by diesel particles involves chromatin modification and degradation of HDAC1. *Am J Respir Cell Mol Biol* 37: 232–239.
28. Lee IT, Wang SW, Lee CW, Chang CC, Lin CC, et al. (2008) Lipoteichoic acid induces HO-1 expression via the TLR2/MyD88/c-Src/NADPH oxidase pathway and Nrf2 in human tracheal smooth muscle cells. *J Immunol* 181: 5093–5110.
29. Lee IT, Luo SF, Lee CW, Wang SW, Lin CC, et al. (2009) Overexpression of HO-1 protects against TNF- $\alpha$ -mediated airway inflammation by down-regulation of TNFR1-dependent oxidative stress. *Am J Pathol* 175: 519–532.
30. Blaine SA, Wick M, Dessev C, Nemenoff RA (2001) Induction of cPLA<sub>2</sub> in lung epithelial cells and non-small cell lung cancer is mediated by Sp1 and c-Jun. *J Biol Chem* 276: 42737–42743.
31. Lee SH, Bahn JH, Whidlock NC, Baek SJ (2010) Activating transcription factor 2 (ATF2) controls tolferenic acid-induced ATF3 expression via MAP kinase pathways. *Oncogene* 29: 5182–5192.
32. Khanapure SP, Garvey DS, Janero DR, Letts LG (2007) Eicosanoids in inflammation: biosynthesis, pharmacology, and therapeutic frontiers. *Curr Top Med Chem* 7: 311–340.
33. Choi IW, Sun K, Kim YS, Ko HM, Im SY, et al. (2005) TNF- $\alpha$  induces the late-phase airway hyperresponsiveness and airway inflammation through cytosolic phospholipase A<sub>2</sub> activation. *J Allergy Clin Immunol* 116: 537–543.
34. Byeon HE, Um SH, Yim JH, Lee HK, Pyo S (2012) Ohioesin F suppresses TNF- $\alpha$ -induced adhesion molecule expression by inactivation of the MAPK, Akt and NF- $\kappa$ B pathways in vascular smooth muscle cells. *Life Sci* 90: 396–406.
35. van VC, Bukczynska PE, Purver MA, Sadek CM, Shields BJ, et al. (2005) Selective regulation of tumor necrosis factor-induced Erk signaling by Src family kinases and the T cell protein tyrosine phosphatase. *Nat Immunol* 6: 253–260.
36. Bradley JR (2008) TNF-mediated inflammatory disease. *J Pathol* 214: 149–160.
37. Pascual RM, Carr EM, Seeds MC, Guo M, Panettieri RA Jr, et al. (2006) Regulatory features of interleukin-1 $\beta$ -mediated prostaglandin E<sub>2</sub> synthesis in airway smooth muscle. *Am J Physiol Lung Cell Mol Physiol* 290: L501–L508.
38. Chi PL, Chen YW, Hsiao LD, Chen YL, Yang CM (2012) Heme oxygenase 1 attenuates interleukin-1 $\beta$ -induced cytosolic phospholipase A<sub>2</sub> expression via a decrease in NADPH oxidase/reactive oxygen species/activator protein 1 activation in rheumatoid arthritis synovial fibroblasts. *Arthritis Rheum* 64: 2114–2125.
39. Cheng SE, Luo SF, Jou MJ, Lin CC, Kou YR, et al. (2009) Cigarette smoke extract induces cytosolic phospholipase A<sub>2</sub> expression via NADPH oxidase, MAPKs, AP-1, and NF- $\kappa$ B in human tracheal smooth muscle cells. *Free Radic Biol Med* 46: 948–960.
40. Hung JJ, Wang YT, Chang WC (2006) Sp1 deacetylation induced by phorbol ester recruits p300 to activate 12(S)-lipoxygenase gene transcription. *Mol Cell Biol* 26: 1770–1785.
41. Wang YN, Chen YJ, Chang WC (2006) Activation of extracellular signal-regulated kinase signaling by epidermal growth factor mediates c-Jun activation and p300 recruitment in keratin 16 gene expression. *Mol Pharmacol* 69: 85–98.
42. Goodman RH, Smolik S (2000) CBP/p300 in cell growth, transformation, and development. *Genes Dev* 14: 1553–1577.
